# Supplementary material for: Cr2TiC2Tx MXene as an adsorbent material in ultrasonic-assisted d-μ-solid phase extraction for trace detection of heavy metals
Source: Royal Society of Chemistry journal article supplement (doi:10.1039/d4nr02556c), 2024-11-06
Supplement: d4nr02556c1.pdf [file d4nr02556c1.pdf]

## Supplementary Information

$\text{Cr}_2\text{TiC}_2\text{T}_x$  MXene as an adsorbent material in ultrasonic-assisted  
d- $\mu$ -solid phase extraction for trace detection of heavy metals

Saman Bagheri,<sup>1\*</sup> Rashmeet Kaur Khurana,<sup>1</sup> Md. Ibrahim Kholil,<sup>1</sup> Michael J. Loes,<sup>1</sup>  
Shengyuan Luo,<sup>1</sup> and Alexander Sinitskii<sup>1,2\*</sup>

*Department of Chemistry and Nebraska Center for Materials and Nanoscience, University  
of Nebraska-Lincoln, Lincoln, Nebraska 68588, United States*

\*E-mails: [sbagheri2@unl.edu](mailto:sbagheri2@unl.edu), [sinitskii@unl.edu](mailto:sinitskii@unl.edu)

The sample preparation, d- $\mu$ -SPE process, and analytical calculations were performed as reported in our previous work.<sup>1</sup>

### **ESI-1 Sample preparation and digestion process.**

All food samples were processed according to our previous report.<sup>1</sup> In brief, food samples were purchased from local markets in Lincoln, Nebraska, USA and were washed and dried in air. The agricultural products were dehydrated at 80 °C for 24 h before grinding. A soil sample was collected from a local farm in Lincoln, Nebraska, USA. Next, powdered food samples were digested in concentrated nitric acid in polyethylene (PE) containers at 100 °C for 4 h. If necessary (when HNO<sub>3</sub> evaporated to less than 2 mL), more HNO<sub>3</sub> was added to the containers. To each of the resulting digestion solutions, 1-5 mL of hydrogen peroxide (30%) was added dropwise at elevated temperature (120 °C) until the liquids became colorless and transparent. For the soil sample, 100 mg of soil was etched in 20 mL of concentrated HCl at 50 °C for 5 h. After cooling down, the solution was centrifuged to produce a clear liquid. Finally, the digestion solution was filtered and diluted for further experiments.

### **ESI-2 d- $\mu$ -SPE process and real-life sample analysis**

Briefly, for the adsorption step in the d- $\mu$ -SPE process, 10 mL samples containing 2 mg L<sup>-1</sup> of Cd<sup>2+</sup> and Pb<sup>2+</sup> were mixed with Cr<sub>2</sub>TiC<sub>2</sub>T<sub>x</sub> MXene and sonicated. At this step, the pH, mass of adsorbent, and sonication time were optimized (see Figure 3b-d). After completing the adsorption step, samples were centrifuged, supernatant solutions were filtered using 0.45  $\mu$ m Whatman syringe filters, and the concentrations of the

supernatant solutions were measured.

After performing the adsorption under optimized conditions, the  $\text{Cr}_2\text{TiC}_2\text{T}_x$  MXene adsorbent was collected and used for desorption studies. Here, the  $\text{Cr}_2\text{TiC}_2\text{T}_x$  MXene containing heavy metals was subjected to a desorption process using inorganic acids and sonicated as part of the preliminary test to find the suitable desorption eluent. Similar to the adsorption step, we used *one-variable-at-a-time method* to optimize the parameters of the desorption step; see Figure 3e-g. Finally, the acid solutions were analyzed by FAAS, and relative recoveries were calculated.

After digesting the real-life samples and diluting the solutions, heavy metal ions in these samples were preconcentrated using the  $\text{Cr}_2\text{TiC}_2\text{T}_x$  MXene-based d- $\mu$ -SPE process under the optimized conditions (as summarized in Table 1) and analyzed by FAAS.

### **ESI-3 Analytical performance calculations**

Analytical calibration curves were plotted to assess the performance of the proposed method, as well as to calculate the limit of quantification (LOQ), the limit of detection (LOD), and the linear dynamic range (LDR).<sup>1, 2</sup>

LOQ, defined as the lowest concentration or signal (multiple measurements) for an analytical method within an accuracy of 85%-115% and a precision of  $\leq 10\%$ ,<sup>3</sup> was calculated as  $\text{LOQ} = 10S_b/m$ , where  $S_b$  is the standard deviation of six consecutive measurements of a blank sample and  $m$  is the slope of the analytical calibration curve.

LOD, defined as the lowest signal from an analyte that can be detected with at least 95% probability,<sup>3</sup> was calculated as  $\text{LOD} = 3.3 S_b/m$ , where  $S_b$  is the standard

deviation of six consecutive measurements of a blank sample and  $m$  is the slope of the analytical calibration curve.

In this study, concentrations are reported as  $(\text{Mean} \pm tS) / N^{1/2}$  to show the accuracy of the recorded signals. **Mean** is the average of the recorded concentrations, **t** is the t value from the t-test table, **S** is the standard deviation, and **N** is the number of signal readings (typically  $N=3$ ). Also, extraction recovery is calculated as described in **Eqn. 1**:

$$ER = \frac{C_F}{C_0} \times 100\% \quad \text{Eqn. 1}$$

where  $C_F$  is the final recovered concentration after desorption, and  $C_0$  is the initial concentration.

The total concentration ( $C_T$ ) of heavy metals in a spiked sample was determined using **Eqn. 2**, where  $C_0$  is the initial concentration of heavy metals and  $C_S$  is the concentration for spiked heavy metals:

$$C_T = (C_0 + C_S) \pm SD \quad \text{Eqn. 2}$$

Relative recovery is a measure of accuracy when reporting the heavy metal contents in real-life samples and is calculated using **Eqn. 3**:

$$RR = \frac{C_T - C_0}{C_S} \times 100\% \quad \text{Eqn. 3}$$

Any significant deviation is a sign of error in the process.

Standard deviation (**Eqn. 4**) is a measure of the precision or closeness of the collected data. SD ( $\sigma$ ) is defined as follows:

$$\sigma = \left( \frac{\sum(x_i - \mu)^2}{N-1} \right)^{\frac{1}{2}}$$

Eqn. 4

where  $X_i$  is the recorded signal for each reading,  $\mu$  is the mean value, and  $N$  is the number of readings for each experiment (typically  $N > 3$ ).

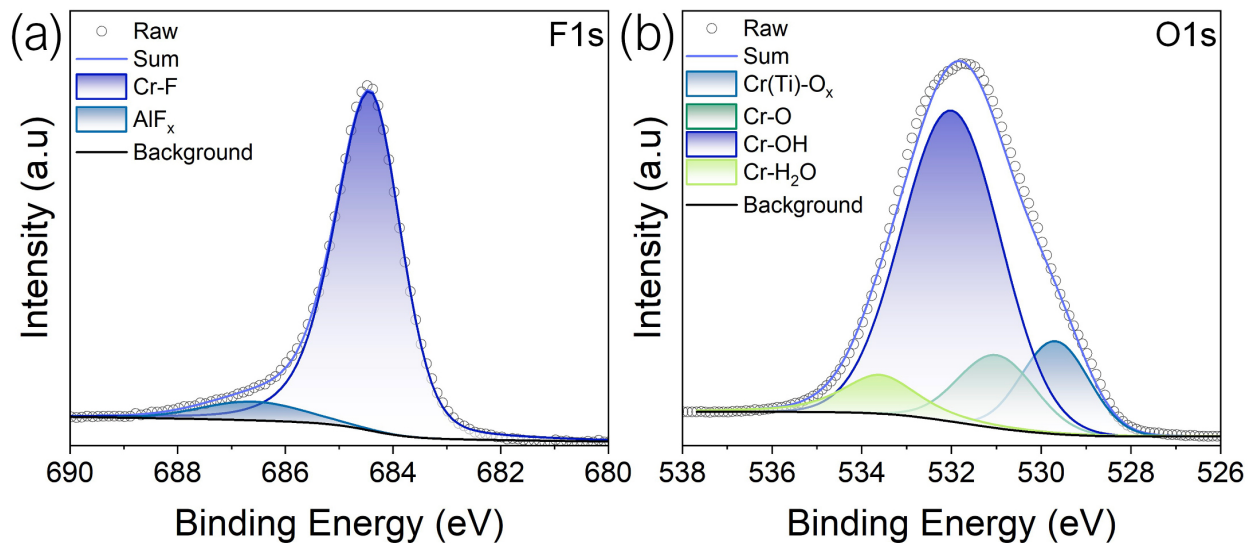

Fig. S1. High-resolution XPS spectra of (a) F1s and (b) O1s regions for  $\text{Cr}_2\text{TiC}_2\text{T}_x$  MXene.

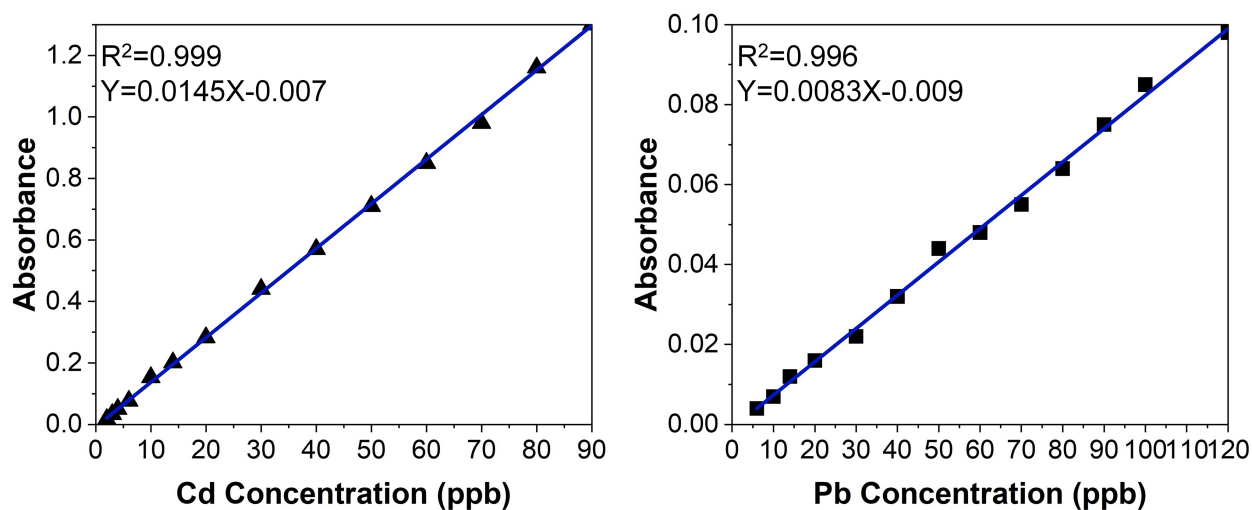

Fig. S2 Analytical calibration curves for cadmium and lead ions.

**Table S1** Effect of interfering ions on the determination of cadmium and lead ions.

| Interfering ion  | Tolerable concentration ratio X/Cd and Pb | <i>RR</i> <sup>a</sup> % ± <i>SD</i> <sup>b</sup> |             |
|------------------|-------------------------------------------|---------------------------------------------------|-------------|
|                  |                                           | Pb                                                | Cd          |
| Na <sup>+</sup>  | 2,500                                     | 102.34±1.28                                       | 101.18±1.71 |
| K <sup>+</sup>   | 2,500                                     | 100.25±1.15                                       | 99.78±2.75  |
| Mg <sup>2+</sup> | 400                                       | 99.85±1.73                                        | 100.13±1.25 |
| Ca <sup>2+</sup> | 400                                       | 100.72±1.73                                       | 100.73±1.86 |
| Zn <sup>2+</sup> | 250                                       | 99.67±1.82                                        | 100.18±1.82 |

<sup>a</sup> Relative Recovery <sup>b</sup> Standard Deviation

**Table S2** Determination of cadmium and lead ions in certified reference materials

| Sample                    | Element         | Certified concentration (mg Kg <sup>-1</sup> ) | Found (mg Kg <sup>-1</sup> ) | Relative error (%) |
|---------------------------|-----------------|------------------------------------------------|------------------------------|--------------------|
| Taiwan Clay Soil (CRM046) | Cd <sup>a</sup> | 7.01 ± 0.177                                   | 6.98±0.22                    | -0.42              |
|                           | Pb <sup>b</sup> | 45.3 ± 1.92                                    | 44.87±0.78                   | -0.95              |

<sup>a</sup> Traceable to NIST SRM 3108 Lot 060531

<sup>b</sup> Traceable to NIST SRM 3128 Lot 030721

**ESI-4** Raw data collected for Figure 3

The following tables summarize the raw data we collected for the optimization of Cr<sub>2</sub>TiC<sub>2</sub>T<sub>x</sub>-d-μ-SPE.

**Table S3.** Raw data for adsorption step.

| Adsorption |             |                |             |              |            |             |                 |             |              |           |             |              |             |              |
|------------|-------------|----------------|-------------|--------------|------------|-------------|-----------------|-------------|--------------|-----------|-------------|--------------|-------------|--------------|
| pH         |             | Adsorbent Mass |             |              |            |             | Sonication Time |             |              |           |             |              |             |              |
| cadmium    |             | Lead           |             | cadmium      |            | Lead        |                 | cadmium     |              | Lead      |             |              |             |              |
| Value      | Removal (%) | St. Dev. (%)   | Removal (%) | St. Dev. (%) | Value (mg) | Removal (%) | St. Dev. (%)    | Removal (%) | St. Dev. (%) | Value (s) | Removal (%) | St. Dev. (%) | Removal (%) | St. Dev. (%) |
| 4          | 61          | 3              | 69          | 1.5          | 1          | 72          | 1.5             | 87          | 2.7          | 60        | 64          | 1.5          | 59          | 1.5          |
| 5          | 77          | 1.8            | 81          | 2            | 3          | 95          | 1.9             | 99          | 1.5          | 90        | 75          | 2            | 72          | 1.9          |
| 6          | 99          | 1.5            | 99          | 1.8          | 5          | 99          | 2.2             | 99          | 2.9          | 120       | 81          | 3.1          | 81          | 3.1          |
| 7          | 99          | 2              | 93          | 2.1          | 10         | 99          | 1.5             | 99          | 1.9          | 150       | 99          | 2.1          | 99          | 1.7          |
| 8          | 95          | 1.3            | 83          | 2.5          | 15         | 99          | 1.1             | 99          | 1.4          | 180       | 99          | 1.6          | 99          | 2.1          |
| 9          | 92          | 1.1            | 80          | 1.1          |            |             |                 |             |              | 240       | 99          | 3.1          | 91          | 1.1          |
|            |             |                |             |              |            |             |                 |             |              | 300       | 91          | 2            | 88          | 1.1          |

**Table S4.** Raw data for desorption step.

| Desorption       |        |              |        |              |            |        |                 |         |              |           |        |              |        |              |
|------------------|--------|--------------|--------|--------------|------------|--------|-----------------|---------|--------------|-----------|--------|--------------|--------|--------------|
| Eluent           |        | Volume       |        |              |            |        | Sonication Time |         |              |           |        |              |        |              |
| Cadmium          |        | Lead         |        | Cadmium      |            | Lead   |                 | Cadmium |              | Lead      |        |              |        |              |
| Type             | RR (%) | St. Dev. (%) | RR (%) | St. Dev. (%) | Value (mL) | RR (%) | St. Dev. (%)    | RR (%)  | St. Dev. (%) | Value (s) | RR (%) | St. Dev. (%) | RR (%) | St. Dev. (%) |
| AcOH             | 58     | 2.5          | 54     | 1            | 0.5        | 38     | 2.1             | 45      | 3.3          | 60        | 64     | 3.2          | 63     | 1.8          |
| HNO <sub>3</sub> | 99     | 1.8          | 99     | 1.1          | 1          | 70     | 1               | 71      | 1.5          | 120       | 75     | 1.5          | 46     | 3            |
| HCl              | 99     | 2.1          | 99     | 1.2          | 1.5        | 95     | 0.9             | 93      | 3.1          | 180       | 81     | 2            | 80     | 1.5          |
|                  |        |              |        |              | 2          | 99     | 3               | 99      | 2            | 240       | 90     | 1            | 92     | 2.5          |
|                  |        |              |        |              | 2.5        | 99     | 2.3             | 99      | 1.8          | 300       | 99     | 1.9          | 99     | 1.3          |
|                  |        |              |        |              | 3          | 99     | 1               | 99      | 2.8          | 360       | 99     | 3.2          | 99     | 1.8          |
|                  |        |              |        |              |            |        |                 |         |              | 420       | 99     | 1.8          | 99     | 1            |



### Supplementary references:

1. S. Bagheri, R. Chilcott, S. Luo and A. Sinitskii, *Langmuir*, 2022, **38**, 12924–12934.
2. M. Behbahani, G. Rabiee, S. Bagheri and M. M. Amini, *Microchemical Journal*, 2022, **183**, 107951.
3. M. Behbahani, V. Zarezade, A. Veisi, F. Omid and S. Bagheri, *International Journal of Environmental Science and Technology*, 2019, **16**, 6431-6440.
